# Supplementary material for: Comparison of National Mental Health Quality Assessment Programs Across the Globe
Source: Atypon-hosted journal article supplement (doi:10.1176/appi.ps.201100382), 2012-10-01
Supplement: 982_ds002.pdf [file 982_ds002.pdf]

Quality assessment programs reported by participating IIMHL Clinical Leaders Project members, listed by country

|                                                                                                                                                                                                                                                                                                                                                                                                                                                                                                                                                                                                                                                                                                                                                                                                                                                                                                                                                                                                                                                                                                                                                                                                     |                                                                                                                                                                                                                                                                                                                                                                                                                                                                                                                                                                                                                                                                                                                                                                                                                                                                                                                                                                                                                                                                                                 |
|-----------------------------------------------------------------------------------------------------------------------------------------------------------------------------------------------------------------------------------------------------------------------------------------------------------------------------------------------------------------------------------------------------------------------------------------------------------------------------------------------------------------------------------------------------------------------------------------------------------------------------------------------------------------------------------------------------------------------------------------------------------------------------------------------------------------------------------------------------------------------------------------------------------------------------------------------------------------------------------------------------------------------------------------------------------------------------------------------------------------------------------------------------------------------------------------------------|-------------------------------------------------------------------------------------------------------------------------------------------------------------------------------------------------------------------------------------------------------------------------------------------------------------------------------------------------------------------------------------------------------------------------------------------------------------------------------------------------------------------------------------------------------------------------------------------------------------------------------------------------------------------------------------------------------------------------------------------------------------------------------------------------------------------------------------------------------------------------------------------------------------------------------------------------------------------------------------------------------------------------------------------------------------------------------------------------|
| <p><b>Australia</b><br/>Mental Health National Outcomes and Casemix Collection)<br/>COAG National Action Plan on Mental Health<br/>National Mental Health Performance Framework<br/>National Mental Health Minimum Data Sets</p> <p><b>Canada</b><br/>National Diabetes Surveillance<br/>Alberta Addiction and Mental Health System Level Performance Measurement</p> <p><b>England</b><br/>Care Quality Commission Periodic Review</p> <p><b>Germany</b><br/>Ambulatory Quality Indicators and Key Measures<br/>Quality Indicator System for Ambulatory Care</p> <p><b>Ireland</b><br/>National Psychiatric In-Patient Reporting System<br/>HealthStat<br/>National Suicide Registry<br/>The National Drug Treatment Reporting System<br/>The inspection programme of the Inspector of Mental Health Services<br/>National Monitoring Group of the Department of Health &amp; Children</p> <p><b>Japan</b><br/>eCODO: Coercive measures database<br/>Mental Health Inpatient Indicators Registry</p> <p><b>The Netherlands</b><br/>GGZ Transparency steering group performance indicators for mental health care and addiction care<br/>Patient Safety Program<br/>Routine Outcome Measurement</p> | <p><b>New Zealand</b><br/>New Zealand Public Health and Disabilities Act (Minister of Health District Health Board Accountability and Monitoring)</p> <p><b>Norway</b><br/>National Quality Indicators</p> <p><b>Scotland</b><br/>Mental Health Collaborative<br/>National Mental Health Benchmarking Project<br/>Scottish Electro-Convulsive Therapy Accreditation Network<br/>Scottish Patients at Risk of Readmission and Admission for Mental Health<br/>National Intensive Psychiatric Care Units Programme<br/>Integrated Care Pathways for Mental Health</p> <p><b>Taiwan</b><br/>Taiwan Quality Indicator Project<br/>NHIB quality measurement</p> <p><b>USA</b><br/>ORYX® Performance Measurement Initiative: Hospital-Based Inpatient Psychiatric Services Core Performance Measures<br/>Physician Quality Reporting Initiative<br/>Uniform Reporting System<br/>Healthcare Effectiveness Data and Information Set<br/>Behavioral Healthcare Performance Measurement System<br/>National Quality Forum<br/>Federal Mental Health Block Grant Transformation Accountability System</p> |
|-----------------------------------------------------------------------------------------------------------------------------------------------------------------------------------------------------------------------------------------------------------------------------------------------------------------------------------------------------------------------------------------------------------------------------------------------------------------------------------------------------------------------------------------------------------------------------------------------------------------------------------------------------------------------------------------------------------------------------------------------------------------------------------------------------------------------------------------------------------------------------------------------------------------------------------------------------------------------------------------------------------------------------------------------------------------------------------------------------------------------------------------------------------------------------------------------------|-------------------------------------------------------------------------------------------------------------------------------------------------------------------------------------------------------------------------------------------------------------------------------------------------------------------------------------------------------------------------------------------------------------------------------------------------------------------------------------------------------------------------------------------------------------------------------------------------------------------------------------------------------------------------------------------------------------------------------------------------------------------------------------------------------------------------------------------------------------------------------------------------------------------------------------------------------------------------------------------------------------------------------------------------------------------------------------------------|
